# Supplementary material for: Health Risks of Kretek Cigarettes: A Systematic Review
Source: PubMed Central journal article supplement (PMC8360627; doi:10.1093/ntr/ntab016), 2021-01-27
Supplement: ntab016_suppl_supplementary_taxonmy_form.pdf [file ntab016_suppl_supplementary_taxonmy_form.pdf]

**Contributorship form for publication in *Nicotine & Tobacco Research*****Authorship Contribution**

In submitting this manuscript to *Nicotine & Tobacco Research*, the corresponding author and any co-authors are confirming that each and every author has, in accordance with the [ICMJE guidelines](#), (a) made a substantial contribution to the conception and design, acquisition of data, and/or analysis and interpretation of data, (b) participated in the drafting of the article or revising it critically for important intellectual content, (c) have read and approved the final manuscript, AND (d) that the manuscript is not, either in whole or in part, currently under consideration by any other scientific journal and has not been previously published in either hard copy or electronic format. Except for those submitting the manuscript, members of Study Groups should not be individually cited as authors; instead the Study Group should be named as an author, and individuals within the group listed in full in an acknowledgement section of the manuscript.

This journal also requires that each and every author's specific contributions to the manuscript be described using the Contributor Roles Taxonomy ([CRediT](#)). This taxonomy includes 14 descriptors representing the roles typically played by contributors to scientific scholarly outputs, and the roles describe each contributor's specific contributions to the manuscript. **For accepted manuscripts, this completed form will publish online as supplementary material.**

**Required Information**

Manuscript Reference (e.g. NTR-2019-0378.R2): NTR-2020-675

Manuscript Title: Health risks of kretek cigarettes: A systematic review

Corresponding Author: Desy Nuryunarsih

Number of Authors: 3

A detailed explanation defining the contribution of each author to the manuscript must be made using the table below.

**Corresponding Author**

As the corresponding author by signing this authorship form you confirm on behalf of yourself and all authors on the paper that this manuscript complies with the authorship policies of *Nicotine & Tobacco Research*.

Full First and Surname: Desy Nuryunarsih

Signature: 

Date: 18/12/2020
